# Supplementary material for: Regulation of Mih1/Cdc25 by protein phosphatase 2A and casein kinase 1
Source: PubMed Central journal article supplement — J Cell Biol. 2008 Mar 10;180(5):931–45. doi: 10.1083/jcb.200711014 (PMC2265403; doi:10.1083/jcb.200711014), 2008-03-10
Supplement: jcellbiol_jcb.200711014_1.pdf [file jcellbiol_jcb.200711014_1.pdf]

| <b>Kinase</b> | <b>ORF</b> |
|---------------|------------|
| CLN3          | YAL040C    |
| PSK1          | YAL017W    |
| KIN3          | YAR018C    |
| KNS1          | YLL019C    |
|               | YLR063W    |
| KIN2          | YLR096W    |
|               | YML059C    |
| APP2          | YMR192W    |
| CLN1          | YMR199W    |
| SKY1          | YMR216C    |
|               | YMR291W    |
| CLA4          | YNL298W    |
| PCL1          | YNL289W    |
| CKA2          | YOR061W    |
| MEK1          | YOR351C    |
| PSK2          | YOL045W    |
| CLN2          | YPL256C    |
|               | YPL236C    |
| TPK2          | YPL203W    |
|               | YPL150W    |
|               | YPL141C    |
| MKK2          | YPL140C    |
|               | YBR262C    |
| CLN3          | YAL040C    |
| PSK1          | YAL017W    |
| KIN3          | YAR018C    |
| KNS1          | YLL019C    |
|               | YLR063W    |
| KIN2          | YLR096W    |
|               | YML059C    |
| APP2          | YMR192W    |
| CLN1          | YMR199W    |
| SKY1          | YMR216C    |
|               | YMR291W    |
| CLA4          | YNL298W    |
| PCL1          | YNL289W    |
| CKA2          | YOR061W    |
| MEK1          | YOR351C    |
| PSK2          | YOL045W    |
| CLN2          | YPL256C    |
|               | YPL236C    |
| TPK2          | YPL203W    |
|               | YPL150W    |
|               | YPL141C    |
| MKK2          | YPL140C    |
|               | YBR262C    |
|               | YDR109C    |
| KIN1          | YDR122W    |
| STE20         | YHL007C    |
| SLT2          | YHR030C    |
| IRE1          | YHR079C    |
| KSP1          | YHR082C    |
| YCK1          | YHR135C    |
| KCC4          | YCL024W    |
| SAT4          | YCR008W    |
| ELM1          | YKL048C    |
| HSL1          | YKL101W    |
| PRR1          | YKL116C    |
| YPK1          | YKL126W    |
|               | YKL161C    |
| TPK3          | YKL166C    |
| KKQ8          | YKL168C    |
|               | YKL171W    |
|               | YGR052W    |
| TWF1          | YGR080W    |
| CLB6          | YGR109C    |

|       |         |
|-------|---------|
| MKK1  | YOR231W |
| KIN4  | YOR233W |
| SWE1  | YJL187C |
| TPK1  | YJL164C |
| STE11 | YLR362W |
| RCK2  | YLR248W |
| VID30 | YGL227W |
| SSN3  | YPL042C |
| ISR1  | YPR106W |
| DBF20 | YPR111W |
| CLB5  | YPR120C |
| KIN82 | YCR091W |
| FUS3  | YBL016W |
| TEL1  | YBL088C |
|       | YGL059W |
| NPR1  | YNL183C |
| YCK2  | YNL154C |
| PTK1  | YKL198C |
| VHS1  | YDR247W |
| CKA1  | YIL035C |
| PRK1  | YIL095W |
|       | YIL042C |
| CMK1  | YFR014C |
| PKH2  | YOL100W |
| SKM1  | YOL113W |
| YGK3  | YOL128C |
| CMK2  | YOL016C |
| SMK1  | YPRO54W |
| IME2  | YJL106W |
| BCK1  | YJL095W |
| BUB1  | YGR188C |
| PRR2  | YDL214C |
| CHK1  | YBR274W |
| PTK2  | YJRO59W |
|       | YJRO61W |
| DUN1  | YDL101C |
| MSS2  | YDL107W |
| PCL2  | YDL127W |
| STE7  | YDL159W |
| ARK1  | YNL020C |
| SSK2  | YNR031C |
|       | YNR047W |
| AKL1  | YBR028C |
| KSS1  | YBR059C |
| DBF2  | YGR040W |
| YAK1  | YGR092W |
| HAL5  | YJL141C |
| CTK1  | YJL165C |
| SSK22 | YKL139W |
| RIM11 | YCR073C |
| IPL1  | YMR139W |
| HRK1  | YPL209C |
| FAB1  | YOR267C |
| PBS2  | YFR019W |
| YPK2  | YJL128C |
|       | YMR104C |
| MRK1  | YDL025C |
|       | YDL079C |
|       | YDR466W |
| PKH1  | YDR490C |
| GIN4  | YDR507C |
| RCK1  | YGL158W |
| TOS3  | YGL179C |
| APG1  | YGL180W |
| YCK3  | YER123W |
| PAK1  | YER129W |
| TOR1  | YJRO66W |
| SNF1  | YDR477W |

|       |         |
|-------|---------|
| SPS1  | YDR523C |
| RIM15 | YFL033C |
| VPS34 | YLR240W |
| PHO85 | YPL031C |
| GCN2  | YDR283C |
| VPS15 | YBR097W |
| MCK1  | YNL307C |

---

Table S2. **TAP-tagged strains screened in this study**

| <b>Kinase</b> | <b>ORF</b> |
|---------------|------------|
| HRR25         | YPL204W    |
| GUK1          | YDR454C    |
| PIK1          | YNL267W    |
| RAD53         | YPL153C    |
| SGV1          | YPR161C    |
| CDC7          | YDL017W    |
| KIN28         | YDL108W    |
| STT4          | YLR305C    |
| CDC15         | YAR019C    |
| CDC5          | YMR001C    |
| CBK1          | YNL161W    |
| IPL1          | YPL209C    |
| SLN1          | YIL147C    |
| MPS1          | YDL028C    |
| CAK1          | YFL029C    |
| TOR2          | YKL203C    |
| MEC1          | YBR136W    |
| TRA1          | YHR099W    |
| PKC1          | YBL105C    |
| MSS4          | YDR208W    |
|               | YOR287C    |
| CKA1          | YIL035C    |
| CKA2          | YOR061W    |
| YCK1          | YHR135C    |
| YCK2          | YNL154C    |
| YCK3          | YER123W    |
| PRK1          | YIL095W    |
| CLB2          | YPR119W    |
| CLN2          | YPL256C    |
| CLB5          | YPR120C    |

---
